# Supplementary material for: A Comprehensive Evaluation of Heavy Metal Contaminations in Soils of Ohio and West Virginia and Cucurbitaceous Vegetables Grown in Respective Farms and Implications on Human Health
Source: Preprints.org preprint supplement (doi:10.20944/preprints202307.0811.v1), 2023-07-12
Supplement: Supplementary file 1 [file supplementary]

**Supplementary information**

**Supplementary table 1:** Soil and vegetable sampling details

| **Sample ID** | **County and state** | **Study area** | **Sampling location (longitude and latitude descriptions)** | **No. of vegetable samples** |
| --- | --- | --- | --- | --- |
| RS 1 | Meigs, OH | Reedsville | 39.087664, -81.803430 | 4 watermelons |
| RS 2 | 39.087731, -81.801123 | 5 squashes |
| RS 3 | 39.087572, -81.799438 | 9 zucchinis |
| RS 4 | 39.087189, -81.798441 | 9 cucumbers |
| RS 5 | 39.087989, -81.797904 | 8 pumpkins |
| RS 6 | Letart | 38.908711, -81.884892 | 5 pumpkins |
| RS 7 | Racine | 39.025204, -81.960059 | 4 pumpkins |
| NM 1 | Athens, OH | New Marshfield | 39.317767, -82.235564 | 8 squashes |
| NM 2 |  |  | 39.316522, -82.236143 | 4 pumpkins |
| MS 1 | Mason, WV | Lakin | 38.955218, -82.078761 | 6 watermelons |
| MS 2 | Mason | 38.955664, -82.015973 | 6 zucchinis |
| MS 3 | 38.953828, -82.016230 | 5 pumpkins |
| HI | Highland, OH | Hillsboro | 45.537141, -123.008823 | 6 cucumbers |

**Supplementary table 2:** Reference parameter values used for heavy metal assessment

| **Parameters** | **Definition** | | **Values** | | **Units** | **Reference** |
| --- | --- | --- | --- | --- | --- | --- |
| **Adult** | **Children** |
| EIR | Average food consumption | | 240 | 133 | gm/person/day | [1] |
| Ef | Exposure frequency | | 365 | 365 | days/year |  |
| ED | Exposure duration | | 78.5 | 78.5 | years |  |
| CM | Metal concentration | | Table 2 | Table 2 | Table 2 |  |
| Cf | Conversion factor for fresh to dry weight of vegetables | | 0.085 | 0.085 | - | [2] |
| BW | Average weight of local residents | | 80 | 31.8 | kg |  |
| TA | Average exposure time (EF × ED) | | 26791 | 26791 | days |  |
|  | Unit conversion factor | | 0.001 | 0.001 | - |  |
| Enrichment factor reference value | | Cd | 0.091 | | µg/g | [3] |
| Cu | 30 | | µg/g | [4] |
| Fe | 5.72 | | % |
| Mn | 550 | | µg/g |
| Ni | 50 | | µg/g |
| Zn | 90 | | µg/g |
| Al | 13.4 | | % |
| Background value for Geo-accumulation Index | | Cd | 0.9 | | mg/kg | [5] |
| Cu | 39 | |  |  |
| Fe | 1% | |  |  |
| Mn | 729 | |  |  |
| Ni | 33 | |  |  |
| Zn | 158 | |  |  |
| CRef reference concentration of the metal in pre-industrial soils | | Cd | 0.12 | | mg/kg | [6, 7] |
| Cu | 18.7 | |
| Fe | 2.02 | |
| Mn | 664 | |
| Ni | 16.8 | |
| Zn | 55.2 | |
| Oral reference dose (Rfd) | | Cd | 0.001 | | mg/kg/day | [8]  [9] |
| Cu | 0.04 | |
| Fe | 0.70 | |
| Mn | 0.14 | |
| Ni | 0.02 | |
| Zn | 0.30 | |
| Oral cancer slope factor (CPSo) (mg/kg/day) | | Cd | 0.38 | | mg/kg/day | [10]  [9] |
| Ni | 1.7 | |

**Supplementary table 3**: PCA with six heavy metals from soil samples.

| **Heavy metals** | **PCA1** | **PCA2** | **PCA3** |
| --- | --- | --- | --- |
| Cd | 0.76 | 0.60 | -0.18 |
| Cu | 0.94 | -0.15 | -0.24 |
| Fe | 0.64 | -0.72 | -0.01 |
| Mn | 0.26 | 0.24 | 0.91 |
| Ni | 0.78 | -0.33 | 0.32 |
| Zn | 0.91 | 0.38 | -0.12 |
| Proportion of variance % | 56.62 | 20.43 | 17.58 |
| Cumulative proportion % | 56.62 | 77.06 | 94.64 |


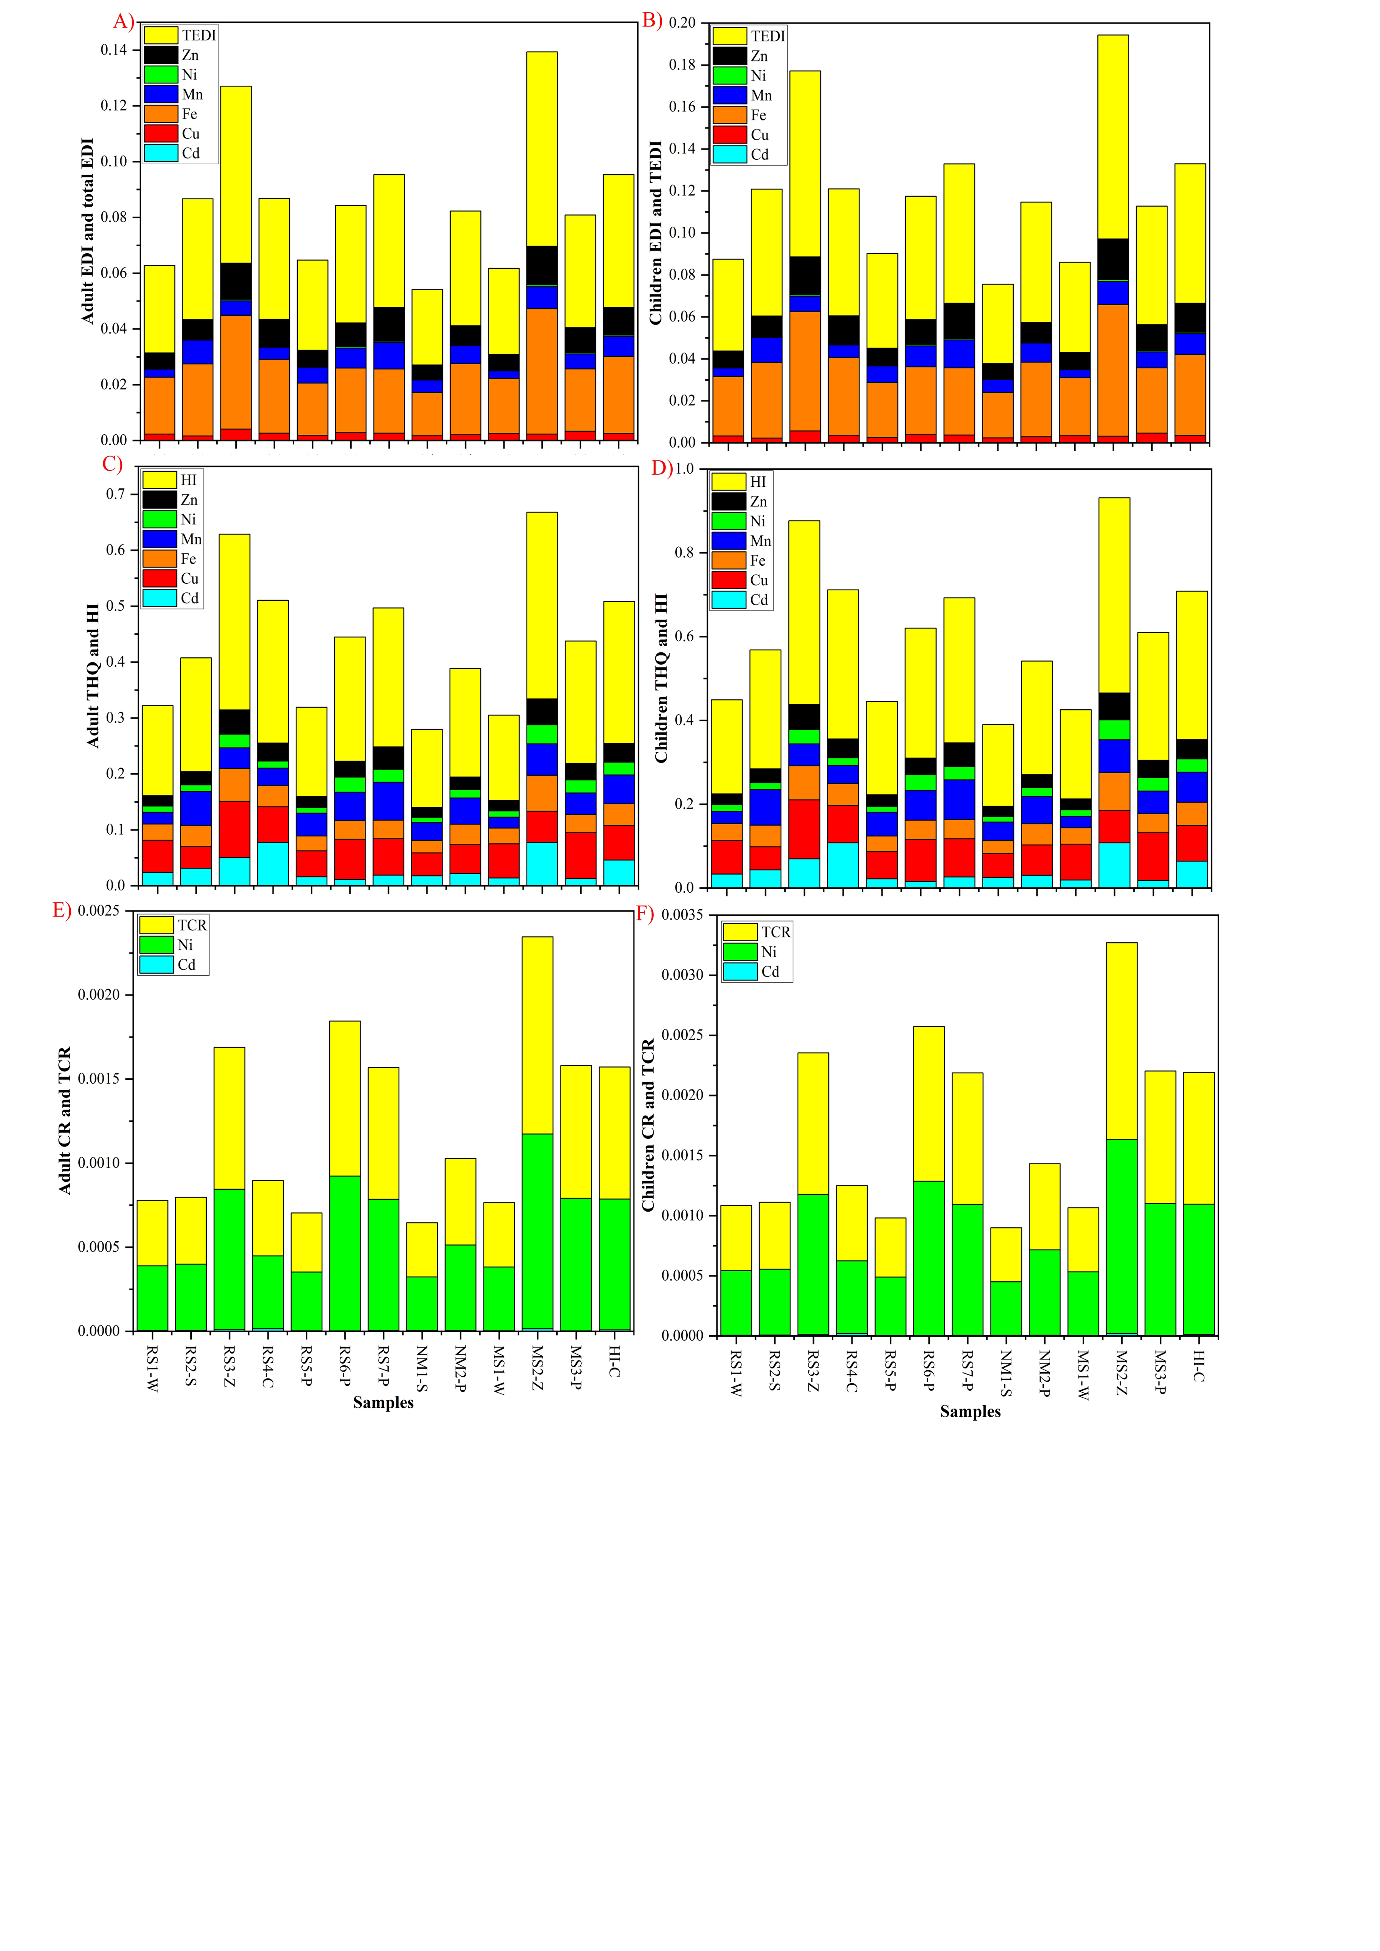


**Supplementary Figure 1:** Noncarcinogenic and carcinogenic health risks assessment of heavy metals from the cucurbit vegetables. EDI and TEDI of A) adult and B) children, THQ and HI of C) adult and D) children.


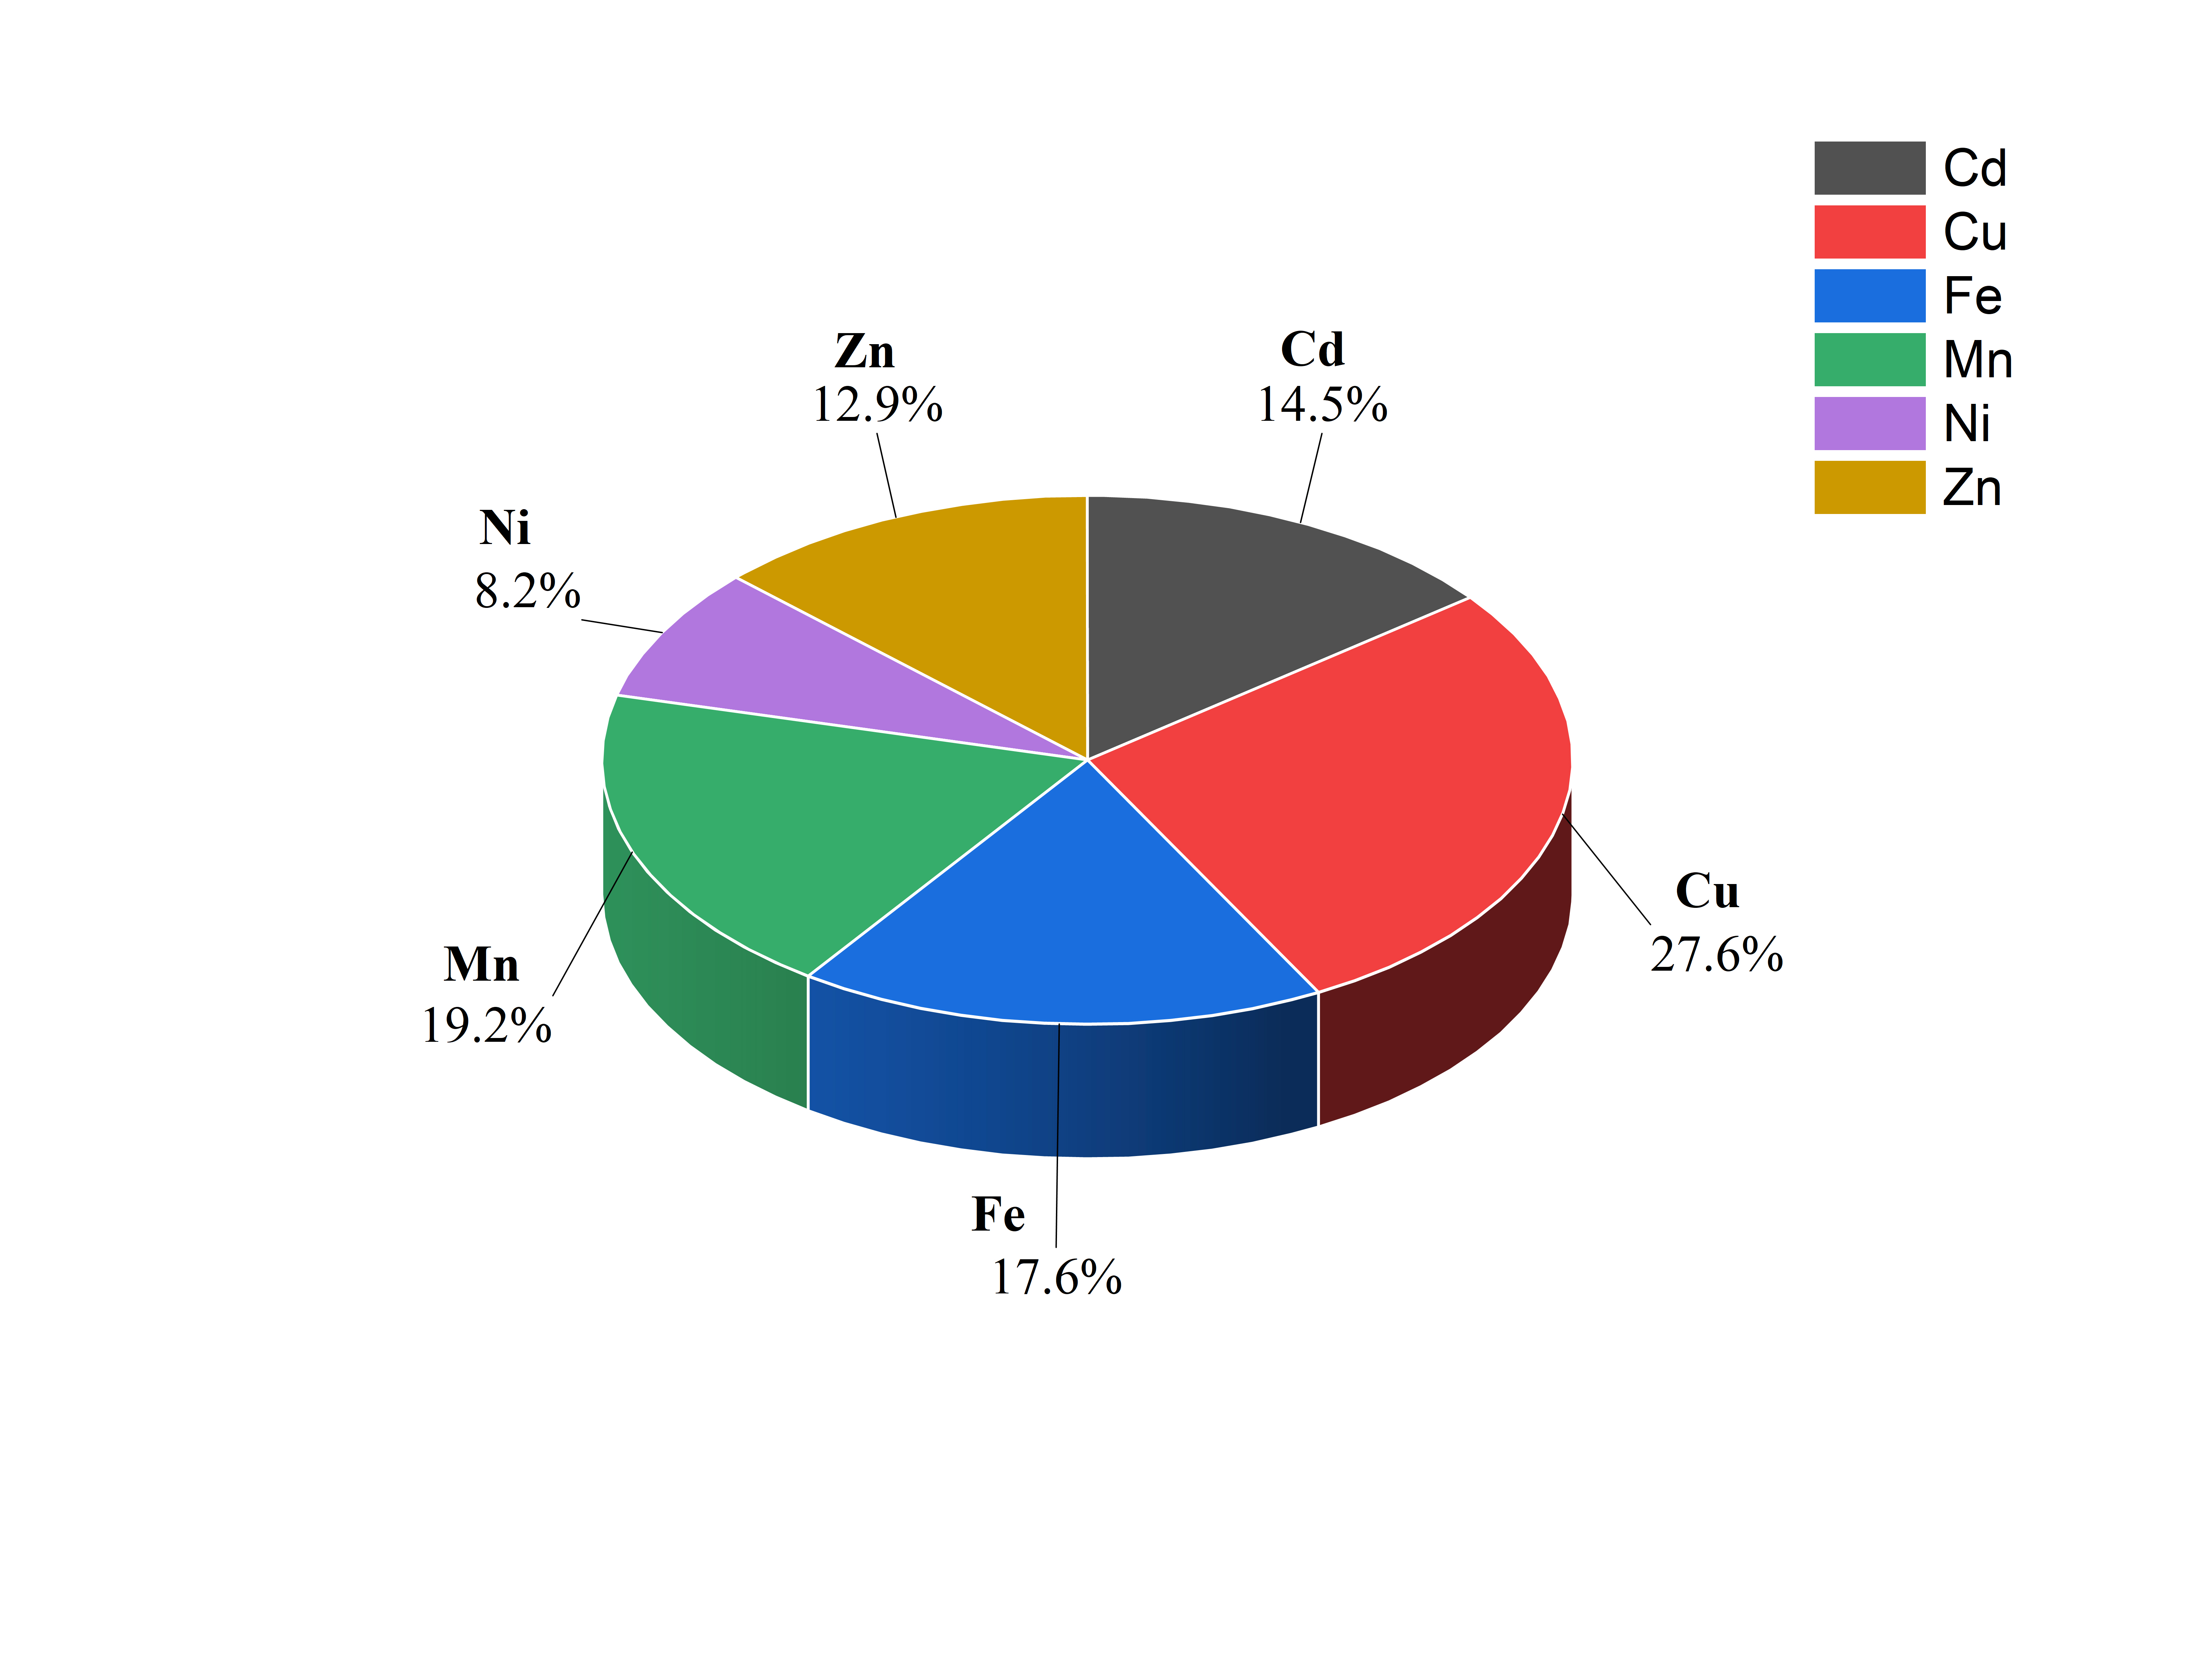


**Supplementary Figure 2:** Contribution of each heavy metal to the total HI (%).

**Reference**

1. Organization, W. H. *The world health report 2002: reducing risks, promoting healthy life*; World Health Organization, 2002.

2. Harmanescu, M.; Alda, L. M.; Bordean, D. M.; Gogoasa, I.; Gergen, I. Heavy metals health risk assessment for population via consumption of vegetables grown in old mining area; a case study: Banat County, Romania. *Chemistry Central Journal* **2011**, *5*, 1-10.

3. Gao, S.; Luo, T.-C.; Zhang, B.-R.; Zhang, H.-F.; Han, Y.-w.; Zhao, Z.-D.; Hu, Y.-K. Chemical composition of the continental crust as revealed by studies in East China. *Geochimica et cosmochimica acta* **1998**, *62* (11), 1959-1975.

4. Ravichandran, M.; Baskaran, M.; Santschi, P. H.; Bianchi, T. S. History of trace metal pollution in Sabine-Neches estuary, Beaumont, Texas. *Environmental science & technology* **1995**, *29* (6), 1495-1503.

5. Lide, D. R. Abundance of elements in the Earth’s crust and in the sea. *CRC handbook of chemistry and physics, Internet Version* **2005**, 14-17.

6. Martínez-Sánchez, M.; Pérez-Sirvent, C. Niveles de fondo y niveles genéricos de referencia de metales pesados en suelos de la Región de Murcia. *Universidad de Murcia. Región de Murcia, Consejería de Desrrollo Sostenible y Ordenación del Territorio. Murcia, Spain* **2007**.

7. Azizi, M.; Faz, A.; Zornoza, R.; Martinez-Martinez, S.; Acosta, J. A. Phytoremediation Potential of Native Plant Species in Mine Soils Polluted by Metal(loid)s and Rare Earth Elements. *Plants (Basel)* **2023**, *12* (6). DOI: 10.3390/plants12061219 From NLM.

8. Antoine, J. M.; Fung, L. A. H.; Grant, C. N. Assessment of the potential health risks associated with the aluminium, arsenic, cadmium and lead content in selected fruits and vegetables grown in Jamaica. *Toxicology reports* **2017**, *4*, 181-187.

9. Javed, M.; Usmani, N. Accumulation of heavy metals and human health risk assessment via the consumption of freshwater fish Mastacembelus armatus inhabiting, thermal power plant effluent loaded canal. *SpringerPlus* **2016**, *5*, 1-8.

10. Yang, J.; Ma, S.; Zhou, J.; Song, Y.; Li, F. Heavy metal contamination in soils and vegetables and health risk assessment of inhabitants in Daye, China. *Journal of international medical research* **2018**, *46* (8), 3374-3387.
